# Supplementary material for: A cell non-autonomous FOXO/DAF-16-mediated germline quality assurance program that responds to somatic DNA damage
Source: Research Square preprint supplement (doi:10.21203/rs.3.rs-1119544/v1), 2022-01-21
Supplement: Supplementary file 2 [file 5bb0b351822c3c2c9bd06796.xlsx]

## Sheet: supplementary table 1
supplementary table 1
Figure no.	Genotype	RNAi	n	Mean LS ± SEM (Days)	% Change w.r.t. control	P-value (w.r.t. control)
Supp Figure No. 1A
	WT	control	226	17.44 ± 0.24
		cdk-12	258	13.06 ± 0.14	-25.11	0
		daf-16	292	14.29 ± 0.16	-18.06	0
Supp Figure No. 1B	daf-16	control	243	16.39 ± 0.23
		cdk-12	192	12.55 ± 0.16	-23.42	0
Supp Figure No. 1C	daf-2	control	410	36.84 ± 0.6
		cdk-12	387	27.93 ± 0.39	-24.19	0
		daf-16	283	25.59 ± 0.39	-30.54	0
Supp Figure No. 1D	daf-16;daf-2	control	358	17.61 ± 0.19
		cdk-12	323	13.83± 0.14	-21.46	0
		daf-16	144	17.59 ± 0.27	-0.11	0.4248
