# Supplementary material for: A cell non-autonomous FOXO/DAF-16-mediated germline quality assurance program that responds to somatic DNA damage
Source: Research Square preprint supplement (doi:10.21203/rs.3.rs-1119544/v1), 2022-01-21
Supplement: Supplementary file 3 [file c8d763302f6407e1950d3e78.xlsx]

## Sheet: FIGURE 1A
FIGURE 1A
	% of dauer:
	Repeat	control	daf-16	pdk-1	cdk-12
	repeat-1	27.2727	0	100	80
	repeat-2	38.0952	0	100	75
	repeat-3	35.7143	0	92.8571	71.4286
	repeat-4	54.5455	0	81.8182	61.9048
	repeat-5	41.6667	0	100	60
	repeat-6	47.0588	0	100	38.8889
	repeat-7	10	0	93.75	73.3333
	repeat-8	40	0	95.8333	86.9565
	repeat-9	23.0769	0	100	88.8889
one-way ANOVA
Number of families	1
Number of comparisons per family	6
Alpha	0.05
Sidak's multiple comparisons test	Mean Diff.	95.00% CI of diff.	Significant?	Summary	Adjusted P Value
control vs. daf-16	35.27	21.17 to 49.37	Yes	****	<0.0001	A-B
control vs. pdk-1	-60.76	-74.86 to -46.66	Yes	****	<0.0001	A-C
control vs. cdk-12	-35.44	-49.54 to -21.34	Yes	****	<0.0001	A-D
daf-16 vs. pdk-1	-96.03	-110.1 to -81.93	Yes	****	<0.0001	B-C
daf-16 vs. cdk-12	-70.71	-84.81 to -56.61	Yes	****	<0.0001	B-D
pdk-1 vs. cdk-12	25.32	11.22 to 39.42	Yes	***	0.0001	C-D
Test details	Mean 1	Mean 2	Mean Diff.	SE of diff.	n1	n2	t	DF
control vs. daf-16	35.27	0	35.27	5.028	9	9	7.015	32
control vs. pdk-1	35.27	96.03	-60.76	5.028	9	9	12.08	32
control vs. cdk-12	35.27	70.71	-35.44	5.028	9	9	7.049	32
daf-16 vs. pdk-1	0	96.03	-96.03	5.028	9	9	19.1	32
daf-16 vs. cdk-12	0	70.71	-70.71	5.028	9	9	14.06	32
pdk-1 vs. cdk-12	96.03	70.71	25.32	5.028	9	9	5.035	32

## Sheet: FIGURE 1C
Figure 1C
	% of fertile worms:
		repeat-1	repeat-2	repeat-3	repeat-1	repeat-2	repeat-3
	strain	control	control	control	cdk-12 RNAi	cdk-12 RNAi	cdk-12 RNAi
	WT	100	100	100	87.1795	92.5926	59.2593
	daf-16(-)	100	100	100	92.7536	100	69.863
	daf-2(-)	100	100	100	2.63158	13.8462	13.6364
	daf-16(-);daf-2(-)	100	100	100	100	95.7447	60
2way ANOVA
Compare cell means regardless of rows and columns
Number of families	1
Number of comparisons per family	28
Alpha	0.05
Sidak's multiple comparisons test	Mean Diff.	95.00% CI of diff.	Significant?	Summary	Adjusted P Value
WT:control RNAi vs. WT:cdk-12 RNAi	20.32	-15.23 to 55.87	No	ns	0.7546
WT:control RNAi vs. daf-16:control RNAi	0	-35.55 to 35.55	No	ns	>0.9999
WT:control RNAi vs. daf-16:cdk-12 RNAi	12.46	-23.09 to 48.01	No	ns	0.9986
WT:control RNAi vs. daf-2:control RNAi	0	-35.55 to 35.55	No	ns	>0.9999
WT:control RNAi vs. daf-2:cdk-12 RNAi	89.96	54.41 to 125.5	Yes	****	<0.0001
WT:control RNAi vs. daf-16;daf-2 :control RNAi	0	-35.55 to 35.55	No	ns	>0.9999
WT:control RNAi vs. daf-16;daf-2 :cdk-12 RNAi	14.75	-20.80 to 50.30	No	ns	0.986
WT:cdk-12 RNAi vs. daf-16:control RNAi	-20.32	-55.87 to 15.23	No	ns	0.7546
WT:cdk-12 RNAi vs. daf-16:cdk-12 RNAi	-7.862	-43.41 to 27.69	No	ns	>0.9999
WT:cdk-12 RNAi vs. daf-2:control RNAi	-20.32	-55.87 to 15.23	No	ns	0.7546
WT:cdk-12 RNAi vs. daf-2:cdk-12 RNAi	69.64	34.09 to 105.2	Yes	****	<0.0001
WT:cdk-12 RNAi vs. daf-16;daf-2 :control RNAi	-20.32	-55.87 to 15.23	No	ns	0.7546
WT:cdk-12 RNAi vs. daf-16;daf-2 :cdk-12 RNAi	-5.571	-41.12 to 29.98	No	ns	>0.9999
daf-16:control RNAi vs. daf-16:cdk-12 RNAi	12.46	-23.09 to 48.01	No	ns	0.9986
daf-16:control RNAi vs. daf-2:control RNAi	0	-35.55 to 35.55	No	ns	>0.9999
daf-16:control RNAi vs. daf-2:cdk-12 RNAi	89.96	54.41 to 125.5	Yes	****	<0.0001
daf-16:control RNAi vs. daf-16;daf-2 :control RNAi	0	-35.55 to 35.55	No	ns	>0.9999
daf-16:control RNAi vs. daf-16;daf-2 :cdk-12 RNAi	14.75	-20.80 to 50.30	No	ns	0.986
daf-16:cdk-12 RNAi vs. daf-2:control RNAi	-12.46	-48.01 to 23.09	No	ns	0.9986
daf-16:cdk-12 RNAi vs. daf-2:cdk-12 RNAi	77.5	41.95 to 113.1	Yes	****	<0.0001
daf-16:cdk-12 RNAi vs. daf-16;daf-2 :control RNAi	-12.46	-48.01 to 23.09	No	ns	0.9986
daf-16:cdk-12 RNAi vs. daf-16;daf-2 :cdk-12 RNAi	2.291	-33.26 to 37.84	No	ns	>0.9999
daf-2:control RNAi vs. daf-2:cdk-12 RNAi	89.96	54.41 to 125.5	Yes	****	<0.0001
daf-2:control RNAi vs. daf-16;daf-2 :control RNAi	0	-35.55 to 35.55	No	ns	>0.9999
daf-2:control RNAi vs. daf-16;daf-2 :cdk-12 RNAi	14.75	-20.80 to 50.30	No	ns	0.986
daf-2:cdk-12 RNAi vs. daf-16;daf-2 :control RNAi	-89.96	-125.5 to -54.41	Yes	****	<0.0001
daf-2:cdk-12 RNAi vs. daf-16;daf-2 :cdk-12 RNAi	-75.21	-110.8 to -39.66	Yes	****	<0.0001
daf-16;daf-2 :control RNAi vs. daf-16;daf-2 :cdk-12 RNAi	14.75	-20.80 to 50.30	No	ns	0.986
Test details	Mean 1	Mean 2	Mean Diff.	SE of diff.	N1	N2	t	DF
WT:control RNAi vs. WT:cdk-12 RNAi	100	79.68	20.32	9.536	3	3	2.131	16
WT:control RNAi vs. daf-16:control RNAi	100	100	0	9.536	3	3	0	16
WT:control RNAi vs. daf-16:cdk-12 RNAi	100	87.54	12.46	9.536	3	3	1.307	16
WT:control RNAi vs. daf-2:control RNAi	100	100	0	9.536	3	3	0	16
WT:control RNAi vs. daf-2:cdk-12 RNAi	100	10.04	89.96	9.536	3	3	9.434	16
WT:control RNAi vs. daf-16;daf-2 :control RNAi	100	100	0	9.536	3	3	0	16
WT:control RNAi vs. daf-16;daf-2 :cdk-12 RNAi	100	85.25	14.75	9.536	3	3	1.547	16
WT:cdk-12 RNAi vs. daf-16:control RNAi	79.68	100	-20.32	9.536	3	3	2.131	16
WT:cdk-12 RNAi vs. daf-16:cdk-12 RNAi	79.68	87.54	-7.862	9.536	3	3	0.8244	16
WT:cdk-12 RNAi vs. daf-2:control RNAi	79.68	100	-20.32	9.536	3	3	2.131	16
WT:cdk-12 RNAi vs. daf-2:cdk-12 RNAi	79.68	10.04	69.64	9.536	3	3	7.303	16
WT:cdk-12 RNAi vs. daf-16;daf-2 :control RNAi	79.68	100	-20.32	9.536	3	3	2.131	16
WT:cdk-12 RNAi vs. daf-16;daf-2 :cdk-12 RNAi	79.68	85.25	-5.571	9.536	3	3	0.5842	16
daf-16:control RNAi vs. daf-16:cdk-12 RNAi	100	87.54	12.46	9.536	3	3	1.307	16
daf-16:control RNAi vs. daf-2:control RNAi	100	100	0	9.536	3	3	0	16
daf-16:control RNAi vs. daf-2:cdk-12 RNAi	100	10.04	89.96	9.536	3	3	9.434	16
daf-16:control RNAi vs. daf-16;daf-2 :control RNAi	100	100	0	9.536	3	3	0	16
daf-16:control RNAi vs. daf-16;daf-2 :cdk-12 RNAi	100	85.25	14.75	9.536	3	3	1.547	16
daf-16:cdk-12 RNAi vs. daf-2:control RNAi	87.54	100	-12.46	9.536	3	3	1.307	16
daf-16:cdk-12 RNAi vs. daf-2:cdk-12 RNAi	87.54	10.04	77.5	9.536	3	3	8.127	16
daf-16:cdk-12 RNAi vs. daf-16;daf-2 :control RNAi	87.54	100	-12.46	9.536	3	3	1.307	16
daf-16:cdk-12 RNAi vs. daf-16;daf-2 :cdk-12 RNAi	87.54	85.25	2.291	9.536	3	3	0.2402	16
daf-2:control RNAi vs. daf-2:cdk-12 RNAi	100	10.04	89.96	9.536	3	3	9.434	16
daf-2:control RNAi vs. daf-16;daf-2 :control RNAi	100	100	0	9.536	3	3	0	16
daf-2:control RNAi vs. daf-16;daf-2 :cdk-12 RNAi	100	85.25	14.75	9.536	3	3	1.547	16
daf-2:cdk-12 RNAi vs. daf-16;daf-2 :control RNAi	10.04	100	-89.96	9.536	3	3	9.434	16
daf-2:cdk-12 RNAi vs. daf-16;daf-2 :cdk-12 RNAi	10.04	85.25	-75.21	9.536	3	3	7.887	16
daf-16;daf-2 :control RNAi vs. daf-16;daf-2 :cdk-12 RNAi	100	85.25	14.75	9.536	3	3	1.547	16

## Sheet: FIGURE 1F
Figure 1F
	OOCYTE COUNT
		repeat-1	repeat-2	repeat-3	repeat-1	repeat-2	repeat-3
	strain	control	control	control	cdk-12 RNAi	cdk-12 RNAi	cdk-12 RNAi
	WT	7.79487	7.24638	7.28571	6.13043	4.625	4.46667
	daf-16(-)	7.32075	7.19149	6.80952	5.56667	4.90909	4.84
	daf-2(-)	4.3125	4.6	4.28571	0	0	0
	daf-16(-);daf-2(-)	8.52632	7.94118	7.35714	6.68	4.45455	4.2381
2way ANOVA
Compare cell means regardless of rows and columns
Number of families	1
Number of comparisons per family	28
Alpha	0.05
Sidak's multiple comparisons test	Mean Diff.	95.00% CI of diff.	Significant?	Summary	Adjusted P Value
WT:control RNAi vs. WT:cdk-12 RNAi	2.368	0.3933 to 4.343	Yes	*	0.0108
WT:control RNAi vs. daf-16:control RNAi	0.3351	-1.640 to 2.310	No	ns	>0.9999
WT:control RNAi vs. daf-16:cdk-12 RNAi	2.337	0.3621 to 4.312	Yes	*	0.0122
WT:control RNAi vs. daf-2:control RNAi	3.043	1.068 to 5.018	Yes	***	0.0008
WT:control RNAi vs. daf-2:cdk-12 RNAi	7.442	5.467 to 9.417	Yes	****	<0.0001
WT:control RNAi vs. daf-16;daf-2:control RNAi	-0.4992	-2.474 to 1.476	No	ns	>0.9999
WT:control RNAi vs. daf-16;daf-2:cdk-12 RNAi	2.318	0.3431 to 4.293	Yes	*	0.0131
WT:cdk-12 RNAi vs. daf-16:control RNAi	-2.033	-4.008 to -0.05825	Yes	*	0.0398
WT:cdk-12 RNAi vs. daf-16:cdk-12 RNAi	-0.03122	-2.006 to 1.944	No	ns	>0.9999
WT:cdk-12 RNAi vs. daf-2:control RNAi	0.6746	-1.300 to 2.650	No	ns	0.9991
WT:cdk-12 RNAi vs. daf-2:cdk-12 RNAi	5.074	3.099 to 7.049	Yes	****	<0.0001
WT:cdk-12 RNAi vs. daf-16;daf-2:control RNAi	-2.868	-4.842 to -0.8925	Yes	**	0.0016
WT:cdk-12 RNAi vs. daf-16;daf-2:cdk-12 RNAi	-0.05018	-2.025 to 1.925	No	ns	>0.9999
daf-16:control RNAi vs. daf-16:cdk-12 RNAi	2.002	0.02703 to 3.977	Yes	*	0.045
daf-16:control RNAi vs. daf-2:control RNAi	2.708	0.7329 to 4.683	Yes	**	0.0029
daf-16:control RNAi vs. daf-2:cdk-12 RNAi	7.107	5.132 to 9.082	Yes	****	<0.0001
daf-16:control RNAi vs. daf-16;daf-2:control RNAi	-0.8343	-2.809 to 1.141	No	ns	0.9827
daf-16:control RNAi vs. daf-16;daf-2:cdk-12 RNAi	1.983	0.008067 to 3.958	Yes	*	0.0485
daf-16:cdk-12 RNAi vs. daf-2:control RNAi	0.7058	-1.269 to 2.681	No	ns	0.9982
daf-16:cdk-12 RNAi vs. daf-2:cdk-12 RNAi	5.105	3.130 to 7.080	Yes	****	<0.0001
daf-16:cdk-12 RNAi vs. daf-16;daf-2:control RNAi	-2.836	-4.811 to -0.8613	Yes	**	0.0018
daf-16:cdk-12 RNAi vs. daf-16;daf-2:cdk-12 RNAi	-0.01896	-1.994 to 1.956	No	ns	>0.9999
daf-2:control RNAi vs. daf-2:cdk-12 RNAi	4.399	2.424 to 6.374	Yes	****	<0.0001
daf-2:control RNAi vs. daf-16;daf-2:control RNAi	-3.542	-5.517 to -1.567	Yes	***	0.0001
daf-2:control RNAi vs. daf-16;daf-2:cdk-12 RNAi	-0.7248	-2.700 to 1.250	No	ns	0.9973
daf-2:cdk-12 RNAi vs. daf-16;daf-2:control RNAi	-7.942	-9.917 to -5.967	Yes	****	<0.0001
daf-2:cdk-12 RNAi vs. daf-16;daf-2:cdk-12 RNAi	-5.124	-7.099 to -3.149	Yes	****	<0.0001
daf-16;daf-2:control RNAi vs. daf-16;daf-2:cdk-12 RNAi	2.817	0.8424 to 4.792	Yes	**	0.0019
Test details	Mean 1	Mean 2	Mean Diff.	SE of diff.	N1	N2	t	DF
WT:control RNAi vs. WT:cdk-12 RNAi	7.442	5.074	2.368	0.5297	3	3	4.471	16
WT:control RNAi vs. daf-16:control RNAi	7.442	7.107	0.3351	0.5297	3	3	0.6325	16
WT:control RNAi vs. daf-16:cdk-12 RNAi	7.442	5.105	2.337	0.5297	3	3	4.412	16
WT:control RNAi vs. daf-2:control RNAi	7.442	4.399	3.043	0.5297	3	3	5.744	16
WT:control RNAi vs. daf-2:cdk-12 RNAi	7.442	0	7.442	0.5297	3	3	14.05	16
WT:control RNAi vs. daf-16;daf-2:control RNAi	7.442	7.942	-0.4992	0.5297	3	3	0.9424	16
WT:control RNAi vs. daf-16;daf-2:cdk-12 RNAi	7.442	5.124	2.318	0.5297	3	3	4.376	16
WT:cdk-12 RNAi vs. daf-16:control RNAi	5.074	7.107	-2.033	0.5297	3	3	3.838	16
WT:cdk-12 RNAi vs. daf-16:cdk-12 RNAi	5.074	5.105	-0.03122	0.5297	3	3	0.05893	16
WT:cdk-12 RNAi vs. daf-2:control RNAi	5.074	4.399	0.6746	0.5297	3	3	1.273	16
WT:cdk-12 RNAi vs. daf-2:cdk-12 RNAi	5.074	0	5.074	0.5297	3	3	9.578	16
WT:cdk-12 RNAi vs. daf-16;daf-2:control RNAi	5.074	7.942	-2.868	0.5297	3	3	5.413	16
WT:cdk-12 RNAi vs. daf-16;daf-2:cdk-12 RNAi	5.074	5.124	-0.05018	0.5297	3	3	0.09472	16
daf-16:control RNAi vs. daf-16:cdk-12 RNAi	7.107	5.105	2.002	0.5297	3	3	3.779	16
daf-16:control RNAi vs. daf-2:control RNAi	7.107	4.399	2.708	0.5297	3	3	5.112	16
daf-16:control RNAi vs. daf-2:cdk-12 RNAi	7.107	0	7.107	0.5297	3	3	13.42	16
daf-16:control RNAi vs. daf-16;daf-2:control RNAi	7.107	7.942	-0.8343	0.5297	3	3	1.575	16
daf-16:control RNAi vs. daf-16;daf-2:cdk-12 RNAi	7.107	5.124	1.983	0.5297	3	3	3.743	16
daf-16:cdk-12 RNAi vs. daf-2:control RNAi	5.105	4.399	0.7058	0.5297	3	3	1.332	16
daf-16:cdk-12 RNAi vs. daf-2:cdk-12 RNAi	5.105	0	5.105	0.5297	3	3	9.637	16
daf-16:cdk-12 RNAi vs. daf-16;daf-2:control RNAi	5.105	7.942	-2.836	0.5297	3	3	5.354	16
daf-16:cdk-12 RNAi vs. daf-16;daf-2:cdk-12 RNAi	5.105	5.124	-0.01896	0.5297	3	3	0.03579	16
daf-2:control RNAi vs. daf-2:cdk-12 RNAi	4.399	0	4.399	0.5297	3	3	8.305	16
daf-2:control RNAi vs. daf-16;daf-2:control RNAi	4.399	7.942	-3.542	0.5297	3	3	6.687	16
daf-2:control RNAi vs. daf-16;daf-2:cdk-12 RNAi	4.399	5.124	-0.7248	0.5297	3	3	1.368	16
daf-2:cdk-12 RNAi vs. daf-16;daf-2:control RNAi	0	7.942	-7.942	0.5297	3	3	14.99	16
daf-2:cdk-12 RNAi vs. daf-16;daf-2:cdk-12 RNAi	0	5.124	-5.124	0.5297	3	3	9.673	16
daf-16;daf-2:control RNAi vs. daf-16;daf-2:cdk-12 RNAi	7.942	5.124	2.817	0.5297	3	3	5.318	16

## Sheet: FIGURE 1H, J
	daf-2(-)
FIGURE 1H		control RNAi									cdk-12 RNAi
	mitotic	86	63	80	81	75	78	67	94	49	70	66	71	69	79	66	62	87	73
	transition	47	33	44	38	40	42	67	94	49	37	47	54	30	34	30	53	46	42
	pachytene	149	172	160	157	167	140	158	140	186	51	92	75	85	93	77	83	116	79
daf-2(-)
one-way ANOVA
Number of families	1
Number of comparisons per family	15
Alpha	0.05
Sidak's multiple comparisons test	Mean Diff.	95.00% CI of diff.	Significant?	Summary	Adjusted P Value
mitotic control RNAi vs. mitotic cdk-12RNAi	3.333	-17.25 to 23.92	No	ns	>0.9999	A-B
mitotic control RNAi vs. transition control RNAi	24.33	3.750 to 44.92	Yes	**	0.0099	A-C
mitotic control RNAi vs. transition cdk-12RNAi	33.33	12.75 to 53.92	Yes	***	0.0001	A-D
mitotic control RNAi vs. pachytene control RNAi	-84	-104.6 to -63.42	Yes	****	<0.0001	A-E
mitotic control RNAi vs. pachytene cdk-12RNAi	-8.667	-29.25 to 11.92	No	ns	0.9653	A-F
mitotic cdk-12RNAi vs. transition control RNAi	21	0.4170 to 41.58	Yes	*	0.0421	B-C
mitotic cdk-12RNAi vs. transition cdk-12RNAi	30	9.417 to 50.58	Yes	***	0.0007	B-D
mitotic cdk-12RNAi vs. pachytene control RNAi	-87.33	-107.9 to -66.75	Yes	****	<0.0001	B-E
mitotic cdk-12RNAi vs. pachytene cdk-12RNAi	-12	-32.58 to 8.583	No	ns	0.7079	B-F
transition control RNAi vs. transition cdk-12RNAi	9	-11.58 to 29.58	No	ns	0.9529	C-D
transition control RNAi vs. pachytene control RNAi	-108.3	-128.9 to -87.75	Yes	****	<0.0001	C-E
transition control RNAi vs. pachytene cdk-12RNAi	-33	-53.58 to -12.42	Yes	***	0.0001	C-F
transition cdk-12RNAi vs. pachytene control RNAi	-117.3	-137.9 to -96.75	Yes	****	<0.0001	D-E
transition cdk-12RNAi vs. pachytene cdk-12RNAi	-42	-62.58 to -21.42	Yes	****	<0.0001	D-F
pachytene control RNAi vs. pachytene cdk-12RNAi	75.33	54.75 to 95.92	Yes	****	<0.0001	E-F
Test details	Mean 1	Mean 2	Mean Diff.	SE of diff.	n1	n2	t	DF
mitotic control RNAi vs. mitotic cdk-12RNAi	74.78	71.44	3.333	6.681	9	9	0.4989	48
mitotic control RNAi vs. transition control RNAi	74.78	50.44	24.33	6.681	9	9	3.642	48
mitotic control RNAi vs. transition cdk-12RNAi	74.78	41.44	33.33	6.681	9	9	4.989	48
mitotic control RNAi vs. pachytene control RNAi	74.78	158.8	-84	6.681	9	9	12.57	48
mitotic control RNAi vs. pachytene cdk-12RNAi	74.78	83.44	-8.667	6.681	9	9	1.297	48
mitotic cdk-12RNAi vs. transition control RNAi	71.44	50.44	21	6.681	9	9	3.143	48
mitotic cdk-12RNAi vs. transition cdk-12RNAi	71.44	41.44	30	6.681	9	9	4.49	48
mitotic cdk-12RNAi vs. pachytene control RNAi	71.44	158.8	-87.33	6.681	9	9	13.07	48
mitotic cdk-12RNAi vs. pachytene cdk-12RNAi	71.44	83.44	-12	6.681	9	9	1.796	48
transition control RNAi vs. transition cdk-12RNAi	50.44	41.44	9	6.681	9	9	1.347	48
transition control RNAi vs. pachytene control RNAi	50.44	158.8	-108.3	6.681	9	9	16.21	48
transition control RNAi vs. pachytene cdk-12RNAi	50.44	83.44	-33	6.681	9	9	4.939	48
transition cdk-12RNAi vs. pachytene control RNAi	41.44	158.8	-117.3	6.681	9	9	17.56	48
transition cdk-12RNAi vs. pachytene cdk-12RNAi	41.44	83.44	-42	6.681	9	9	6.286	48
pachytene control RNAi vs. pachytene cdk-12RNAi	158.8	83.44	75.33	6.681	9	9	11.28	48
FIGURE 1J
	daf-16(-);daf-2(-)
		control RNAi																	cdk-12 RNAi
	mitotic	88	87	86	104	90	107	130	131	123	120	117	120	145	134	106	133	119	107	107	90	102	92	109	108	124	110	114	99	82	103	113	95	121	114
	transition	46	57	49	57	50	52	54	57	56	52	48	41	44	49	49	55	47	49	53	52	38	41	50	43	44	49	56	76	60	48	55	40	37	60
	pachytene	154	163	156	137	181	166	146	147	174	143	128							168	144	156	110	168	92	122	133	111	137	115	132	106	122	109	162	137
daf-16(-);daf-2(-)
one-way ANOVA
Number of families	1
Number of comparisons per family	15
Alpha	0.05
Sidak's multiple comparisons test	Mean Diff.	95.00% CI of diff.	Significant?	Summary	Adjusted P Value
mitotic control RNAi vs. mitotic cdk-12RNAi	8.824	-6.679 to 24.33	No	ns	0.7585	A-B
mitotic control RNAi vs. transition control RNAi	63.35	47.85 to 78.86	Yes	****	<0.0001	A-C
mitotic control RNAi vs. transition cdk-12RNAi	64.06	48.56 to 79.56	Yes	****	<0.0001	A-D
mitotic control RNAi vs. pachytene control RNAi	-39.97	-57.46 to -22.48	Yes	****	<0.0001	A-E
mitotic control RNAi vs. pachytene cdk-12RNAi	-16.71	-32.21 to -1.203	Yes	*	0.0248	A-F
mitotic cdk-12RNAi vs. transition control RNAi	54.53	39.03 to 70.03	Yes	****	<0.0001	B-C
mitotic cdk-12RNAi vs. transition cdk-12RNAi	55.24	39.73 to 70.74	Yes	****	<0.0001	B-D
mitotic cdk-12RNAi vs. pachytene control RNAi	-48.8	-66.29 to -31.31	Yes	****	<0.0001	B-E
mitotic cdk-12RNAi vs. pachytene cdk-12RNAi	-25.53	-41.03 to -10.03	Yes	****	<0.0001	B-F
transition control RNAi vs. transition cdk-12RNAi	0.7059	-14.80 to 16.21	No	ns	>0.9999	C-D
transition control RNAi vs. pachytene control RNAi	-103.3	-120.8 to -85.84	Yes	****	<0.0001	C-E
transition control RNAi vs. pachytene cdk-12RNAi	-80.06	-95.56 to -64.56	Yes	****	<0.0001	C-F
transition cdk-12RNAi vs. pachytene control RNAi	-104	-121.5 to -86.54	Yes	****	<0.0001	D-E
transition cdk-12RNAi vs. pachytene cdk-12RNAi	-80.76	-96.27 to -65.26	Yes	****	<0.0001	D-F
pachytene control RNAi vs. pachytene cdk-12RNAi	23.27	5.778 to 40.76	Yes	**	0.0019	E-F
Test details	Mean 1	Mean 2	Mean Diff.	SE of diff.	n1	n2	t	DF
mitotic control RNAi vs. mitotic cdk-12RNAi	114.1	105.3	8.824	5.154	17	17	1.712	90
mitotic control RNAi vs. transition control RNAi	114.1	50.76	63.35	5.154	17	17	12.29	90
mitotic control RNAi vs. transition cdk-12RNAi	114.1	50.06	64.06	5.154	17	17	12.43	90
mitotic control RNAi vs. pachytene control RNAi	114.1	154.1	-39.97	5.815	17	11	6.874	90
mitotic control RNAi vs. pachytene cdk-12RNAi	114.1	130.8	-16.71	5.154	17	17	3.241	90
mitotic cdk-12RNAi vs. transition control RNAi	105.3	50.76	54.53	5.154	17	17	10.58	90
mitotic cdk-12RNAi vs. transition cdk-12RNAi	105.3	50.06	55.24	5.154	17	17	10.72	90
mitotic cdk-12RNAi vs. pachytene control RNAi	105.3	154.1	-48.8	5.815	17	11	8.392	90
mitotic cdk-12RNAi vs. pachytene cdk-12RNAi	105.3	130.8	-25.53	5.154	17	17	4.953	90
transition control RNAi vs. transition cdk-12RNAi	50.76	50.06	0.7059	5.154	17	17	0.1369	90
transition control RNAi vs. pachytene control RNAi	50.76	154.1	-103.3	5.815	17	11	17.77	90
transition control RNAi vs. pachytene cdk-12RNAi	50.76	130.8	-80.06	5.154	17	17	15.53	90
transition cdk-12RNAi vs. pachytene control RNAi	50.06	154.1	-104	5.815	17	11	17.89	90
transition cdk-12RNAi vs. pachytene cdk-12RNAi	50.06	130.8	-80.76	5.154	17	17	15.67	90
pachytene control RNAi vs. pachytene cdk-12RNAi	154.1	130.8	23.27	5.815	11	17	4.001	90

## Sheet: FIGURE 1L
daf-16 isoform:	FIGURE 1L
	% of fertile worms:
		repeat-1	repeat-2	repeat-3	repeat-1	repeat-2	repeat-3
	strain	control	control	control	cdk-12 RNAi	cdk-12 RNAi	cdk-12 RNAi
	daf-16(-);daf-2(-)	100	100	100	100	95.7447	60
	daf-2(-); daf-16(-); daf-16a	100	100	100	15.1899	23.0769	53.0612
	daf-2(-); daf-16(-); daf-16b	100	100	100	79.4872	78.0488	37.7358
	daf-2(-); daf-16(-); daf-16d/f	100	100	100	60.8696	92.1569	85.7143
2way ANOVA
Compare cell means regardless of rows and columns
Number of families	1
Number of comparisons per family	28
Alpha	0.05
Sidak's multiple comparisons test	Mean Diff.	95.00% CI of diff.	Significant?	Summary	Adjusted P Value
daf-16;daf-2 mutant:control RNAi vs. daf-16;daf-2 mutant:cdk-12 RNAi	14.75	-29.84 to 59.34	No	ns	0.9995
daf-16;daf-2 mutant:control RNAi vs. daf-16a:control RNAi	0	-44.59 to 44.59	No	ns	>0.9999
daf-16;daf-2 mutant:control RNAi vs. daf-16a:cdk-12 RNAi	69.56	24.97 to 114.1	Yes	***	0.0007
daf-16;daf-2 mutant:control RNAi vs. daf-16b:control RNAi	0	-44.59 to 44.59	No	ns	>0.9999
daf-16;daf-2 mutant:control RNAi vs. daf-16b:cdk-12 RNAi	34.91	-9.680 to 79.50	No	ns	0.2462
daf-16;daf-2 mutant:control RNAi vs. daf-16d/f:control RNAi	0	-44.59 to 44.59	No	ns	>0.9999
daf-16;daf-2 mutant:control RNAi vs. daf-16d/f:cdk-12 RNAi	20.42	-24.17 to 65.01	No	ns	0.9581
daf-16;daf-2 mutant:cdk-12 RNAi vs. daf-16a:control RNAi	-14.75	-59.34 to 29.84	No	ns	0.9995
daf-16;daf-2 mutant:cdk-12 RNAi vs. daf-16a:cdk-12 RNAi	54.81	10.22 to 99.40	Yes	**	0.0086
daf-16;daf-2 mutant:cdk-12 RNAi vs. daf-16b:control RNAi	-14.75	-59.34 to 29.84	No	ns	0.9995
daf-16;daf-2 mutant:cdk-12 RNAi vs. daf-16b:cdk-12 RNAi	20.16	-24.43 to 64.75	No	ns	0.9633
daf-16;daf-2 mutant:cdk-12 RNAi vs. daf-16d/f:control RNAi	-14.75	-59.34 to 29.84	No	ns	0.9995
daf-16;daf-2 mutant:cdk-12 RNAi vs. daf-16d/f:cdk-12 RNAi	5.668	-38.92 to 50.26	No	ns	>0.9999
daf-16a:control RNAi vs. daf-16a:cdk-12 RNAi	69.56	24.97 to 114.1	Yes	***	0.0007
daf-16a:control RNAi vs. daf-16b:control RNAi	0	-44.59 to 44.59	No	ns	>0.9999
daf-16a:control RNAi vs. daf-16b:cdk-12 RNAi	34.91	-9.680 to 79.50	No	ns	0.2462
daf-16a:control RNAi vs. daf-16d/f:control RNAi	0	-44.59 to 44.59	No	ns	>0.9999
daf-16a:control RNAi vs. daf-16d/f:cdk-12 RNAi	20.42	-24.17 to 65.01	No	ns	0.9581
daf-16a:cdk-12 RNAi vs. daf-16b:control RNAi	-69.56	-114.1 to -24.97	Yes	***	0.0007
daf-16a:cdk-12 RNAi vs. daf-16b:cdk-12 RNAi	-34.65	-79.24 to 9.942	No	ns	0.256
daf-16a:cdk-12 RNAi vs. daf-16d/f:control RNAi	-69.56	-114.1 to -24.97	Yes	***	0.0007
daf-16a:cdk-12 RNAi vs. daf-16d/f:cdk-12 RNAi	-49.14	-93.73 to -4.548	Yes	*	0.0228
daf-16b:control RNAi vs. daf-16b:cdk-12 RNAi	34.91	-9.680 to 79.50	No	ns	0.2462
daf-16b:control RNAi vs. daf-16d/f:control RNAi	0	-44.59 to 44.59	No	ns	>0.9999
daf-16b:control RNAi vs. daf-16d/f:cdk-12 RNAi	20.42	-24.17 to 65.01	No	ns	0.9581
daf-16b:cdk-12 RNAi vs. daf-16d/f:control RNAi	-34.91	-79.50 to 9.680	No	ns	0.2462
daf-16b:cdk-12 RNAi vs. daf-16d/f:cdk-12 RNAi	-14.49	-59.08 to 30.10	No	ns	0.9996
daf-16d/f:control RNAi vs. daf-16d/f:cdk-12 RNAi	20.42	-24.17 to 65.01	No	ns	0.9581
Test details	Mean 1	Mean 2	Mean Diff.	SE of diff.	N1	N2	t	DF
daf-16;daf-2 mutant:control RNAi vs. daf-16;daf-2 mutant:cdk-12 RNAi	100	85.25	14.75	11.96	3	3	1.233	16
daf-16;daf-2 mutant:control RNAi vs. daf-16a:control RNAi	100	100	0	11.96	3	3	0	16
daf-16;daf-2 mutant:control RNAi vs. daf-16a:cdk-12 RNAi	100	30.44	69.56	11.96	3	3	5.816	16
daf-16;daf-2 mutant:control RNAi vs. daf-16b:control RNAi	100	100	0	11.96	3	3	0	16
daf-16;daf-2 mutant:control RNAi vs. daf-16b:cdk-12 RNAi	100	65.09	34.91	11.96	3	3	2.919	16
daf-16;daf-2 mutant:control RNAi vs. daf-16d/f:control RNAi	100	100	0	11.96	3	3	0	16
daf-16;daf-2 mutant:control RNAi vs. daf-16d/f:cdk-12 RNAi	100	79.58	20.42	11.96	3	3	1.707	16
daf-16;daf-2 mutant:cdk-12 RNAi vs. daf-16a:control RNAi	85.25	100	-14.75	11.96	3	3	1.233	16
daf-16;daf-2 mutant:cdk-12 RNAi vs. daf-16a:cdk-12 RNAi	85.25	30.44	54.81	11.96	3	3	4.582	16
daf-16;daf-2 mutant:cdk-12 RNAi vs. daf-16b:control RNAi	85.25	100	-14.75	11.96	3	3	1.233	16
daf-16;daf-2 mutant:cdk-12 RNAi vs. daf-16b:cdk-12 RNAi	85.25	65.09	20.16	11.96	3	3	1.685	16
daf-16;daf-2 mutant:cdk-12 RNAi vs. daf-16d/f:control RNAi	85.25	100	-14.75	11.96	3	3	1.233	16
daf-16;daf-2 mutant:cdk-12 RNAi vs. daf-16d/f:cdk-12 RNAi	85.25	79.58	5.668	11.96	3	3	0.4739	16
daf-16a:control RNAi vs. daf-16a:cdk-12 RNAi	100	30.44	69.56	11.96	3	3	5.816	16
daf-16a:control RNAi vs. daf-16b:control RNAi	100	100	0	11.96	3	3	0	16
daf-16a:control RNAi vs. daf-16b:cdk-12 RNAi	100	65.09	34.91	11.96	3	3	2.919	16
daf-16a:control RNAi vs. daf-16d/f:control RNAi	100	100	0	11.96	3	3	0	16
daf-16a:control RNAi vs. daf-16d/f:cdk-12 RNAi	100	79.58	20.42	11.96	3	3	1.707	16
daf-16a:cdk-12 RNAi vs. daf-16b:control RNAi	30.44	100	-69.56	11.96	3	3	5.816	16
daf-16a:cdk-12 RNAi vs. daf-16b:cdk-12 RNAi	30.44	65.09	-34.65	11.96	3	3	2.897	16
daf-16a:cdk-12 RNAi vs. daf-16d/f:control RNAi	30.44	100	-69.56	11.96	3	3	5.816	16
daf-16a:cdk-12 RNAi vs. daf-16d/f:cdk-12 RNAi	30.44	79.58	-49.14	11.96	3	3	4.108	16
daf-16b:control RNAi vs. daf-16b:cdk-12 RNAi	100	65.09	34.91	11.96	3	3	2.919	16
daf-16b:control RNAi vs. daf-16d/f:control RNAi	100	100	0	11.96	3	3	0	16
daf-16b:control RNAi vs. daf-16d/f:cdk-12 RNAi	100	79.58	20.42	11.96	3	3	1.707	16
daf-16b:cdk-12 RNAi vs. daf-16d/f:control RNAi	65.09	100	-34.91	11.96	3	3	2.919	16
daf-16b:cdk-12 RNAi vs. daf-16d/f:cdk-12 RNAi	65.09	79.58	-14.49	11.96	3	3	1.211	16
daf-16d/f:control RNAi vs. daf-16d/f:cdk-12 RNAi	100	79.58	20.42	11.96	3	3	1.707	16

## Sheet: SUP 1A,B,C,D lifespan
combine lifespan 3 Repeat
SUP 1A,B,C,D lifespan
Strain Name	WT control RNAi			WT cdk-12 RNAi			WT daf-16 RNAi			daf-2 control RNAi			daf-2 cdk-12 RNAi			daf-2 daf-16 RNAi			daf-16;daf-2 control RNAi			daf-16;daf-2 cdk-12 RNAi			daf-16;daf-2 daf-16 RNAi			daf-16 control RNAi			daf-16 cdk-12 RNAi
N =	226			258			292			399			387			383			358			323			144			243			192
	Day	# Deaths		Day	# Deaths		Day	# Deaths		Day	# Deaths		Day	# Deaths		Day	# Deaths		Day	# Deaths		Day	# Deaths		Day	# Deaths		Day	# Deaths		Day	# Deaths
	0	0		0	0		0	0		0	0		0	0		0	0		0	0		0	0		0	0		0	0		0	0
	1	0		1	0		1	0		1	0		1	0		1	0		1	0		1	0		1	0		1	0		1	0
	2	0		2	0		2	0		2	0		2	0		2	0		2	0		2	0		2	0		2	0		2	0
	3	0		3	0		3	0		3	0		3	0		3	0		3	0		3	0		3	0		3	0		3	0
	4	0		4	0		4	0		4	0		4	0		4	0		4	0		4	0		4	0		4	0		4	0
	5	0		5	0		5	0		5	0		5	0		5	0		5	0		5	0		5	0		5	0		5	0
	6	0		6	0		6	0		6	0		6	0		6	0		6	0		6	0		6	0		6	0		6	0
	7	0		7	0		7	0		7	0		7	0		7	0		7	0		7	0		7	0		7	0		7	0
	8	0		8	0		8	0		10	0		10	0		10	1		8	0		8	0		8	0		9	0		9	0
	9	0		9	0		9	3		11	0		11	3		11	4		10	6		10	21		11	7		10	24		10	55
	10	2		10	10		10	13		13	8		13	6		13	3		11	7		11	43		14	38		11	3		11	21
	11	10		11	82		11	36		14	5		14	9		14	8		12	8		12	15		16	22		13	52		13	75
	13	18		13	96		13	92		16	8		16	12		16	18		13	40		13	84		20	64		15	13		15	22
	14	33		14	20		14	38		17	4		17	0		20	41		14	27		14	70		22	11		16	38		16	0
	15	18		15	17		15	22		19	4		19	2		22	28		16	92		16	64		25	2		17	15		17	19
	16	7		16	10		16	16		20	21		20	45		25	50		18	3		18	7					19	23
	17	32		17	7		17	42		22	22		22	41		27	34		20	103		20	17					20	48
	18	25		18	10		18	15		25	19		25	52		29	32		21	8		21	2					21	21
	20	21		20	0		20	0		27	11		27	35		31	21		22	57								22	1
	21	42		21	6		21	12		29	21		29	30		34	23		23	6								23	5
	23	10		23	0		23	3		30	8		30	18		37	9		25	0
	26	8								31	26		31	30		40	7		28	1
										34	28		34	33		43	4
										37	33		37	27
										40	38		40	24
										43	38		43	17
										46	40		47	3
										49	5
										50	16
										54	12
										55	12
										57	12
										58	8
										60	11
Figure no.	Genotype	RNAi	n	Mean LS ± SEM (Days)	% Change w.r.t. control	P-value (w.r.t. control)
Supp Figure No. 1A
	WT	control	226	17.44 ± 0.24
		cdk-12	258	13.06 ± 0.14	-25.11	0
		daf-16	292	14.29 ± 0.16	-18.06	0
Supp Figure No. 1B	daf-16	control	243	16.39 ± 0.23
		cdk-12	192	12.55 ± 0.16	-23.42	0
Supp Figure No. 1C	daf-2	control	410	36.84 ± 0.6
		cdk-12	387	27.93 ± 0.39	-24.19	0
		daf-16	283	25.59 ± 0.39	-30.54	0
Supp Figure No. 1D	daf-16;daf-2	control	358	17.61 ± 0.19
		cdk-12	323	13.83± 0.14	-21.46	0
		daf-16	144	17.59 ± 0.27	-0.11	0.4248

## Sheet: Supplementary FIG 1E
Supplementary FIG 1E	Fold change
		repeat-1	repeat-2	repeat-3	repeat-1	repeat-2	repeat-3
	strain	control	control	control	cdk-12 RNAi	cdk-12 RNAi	cdk-12 RNAi
	WT	1	1	1	0.380245	0.34748	0.396392
	daf-2(-)	1	1	1	0.737135	0.278355	0.37501
	daf-16(-);daf-2(-)	1	1	1	0.51943	0.558644	0.241484
2way ANOVA
Compare cell means regardless of rows and columns
Number of families	1
Number of comparisons per family	15
Alpha	0.05
Sidak's multiple comparisons test	Mean Diff.	95.00% CI of diff.	Significant?	Summary	Adjusted P Value
WT :control RNAi vs. WT :cdk-12 RNAi	0.6253	0.2637 to 0.9869	Yes	***	0.0006
WT :control RNAi vs. daf-2:control RNAi	0	-0.3616 to 0.3616	No	ns	>0.9999
WT :control RNAi vs. daf-2:cdk-12 RNAi	0.5365	0.1749 to 0.8981	Yes	**	0.0024
WT :control RNAi vs. daf-16;daf-2:control RNAi	0	-0.3616 to 0.3616	No	ns	>0.9999
WT :control RNAi vs. daf-16;daf-2:cdk-12 RNAi	0.5601	0.1986 to 0.9217	Yes	**	0.0017
WT :cdk-12 RNAi vs. daf-2:control RNAi	-0.6253	-0.9869 to -0.2637	Yes	***	0.0006
WT :cdk-12 RNAi vs. daf-2:cdk-12 RNAi	-0.08879	-0.4504 to 0.2728	No	ns	0.9994
WT :cdk-12 RNAi vs. daf-16;daf-2:control RNAi	-0.6253	-0.9869 to -0.2637	Yes	***	0.0006
WT :cdk-12 RNAi vs. daf-16;daf-2:cdk-12 RNAi	-0.06515	-0.4267 to 0.2964	No	ns	>0.9999
daf-2:control RNAi vs. daf-2:cdk-12 RNAi	0.5365	0.1749 to 0.8981	Yes	**	0.0024
daf-2:control RNAi vs. daf-16;daf-2:control RNAi	0	-0.3616 to 0.3616	No	ns	>0.9999
daf-2:control RNAi vs. daf-16;daf-2:cdk-12 RNAi	0.5601	0.1986 to 0.9217	Yes	**	0.0017
daf-2:cdk-12 RNAi vs. daf-16;daf-2:control RNAi	-0.5365	-0.8981 to -0.1749	Yes	**	0.0024
daf-2:cdk-12 RNAi vs. daf-16;daf-2:cdk-12 RNAi	0.02365	-0.3379 to 0.3852	No	ns	>0.9999
daf-16;daf-2:control RNAi vs. daf-16;daf-2:cdk-12 RNAi	0.5601	0.1986 to 0.9217	Yes	**	0.0017
Test details	Mean 1	Mean 2	Mean Diff.	SE of diff.	N1	N2	t	DF
WT :control RNAi vs. WT :cdk-12 RNAi	1	0.3747	0.6253	0.09945	3	3	6.288	12
WT :control RNAi vs. daf-2:control RNAi	1	1	0	0.09945	3	3	0	12
WT :control RNAi vs. daf-2:cdk-12 RNAi	1	0.4635	0.5365	0.09945	3	3	5.395	12
WT :control RNAi vs. daf-16;daf-2:control RNAi	1	1	0	0.09945	3	3	0	12
WT :control RNAi vs. daf-16;daf-2:cdk-12 RNAi	1	0.4399	0.5601	0.09945	3	3	5.633	12
WT :cdk-12 RNAi vs. daf-2:control RNAi	0.3747	1	-0.6253	0.09945	3	3	6.288	12
WT :cdk-12 RNAi vs. daf-2:cdk-12 RNAi	0.3747	0.4635	-0.08879	0.09945	3	3	0.8929	12
WT :cdk-12 RNAi vs. daf-16;daf-2:control RNAi	0.3747	1	-0.6253	0.09945	3	3	6.288	12
WT :cdk-12 RNAi vs. daf-16;daf-2:cdk-12 RNAi	0.3747	0.4399	-0.06515	0.09945	3	3	0.6551	12
daf-2:control RNAi vs. daf-2:cdk-12 RNAi	1	0.4635	0.5365	0.09945	3	3	5.395	12
daf-2:control RNAi vs. daf-16;daf-2:control RNAi	1	1	0	0.09945	3	3	0	12
daf-2:control RNAi vs. daf-16;daf-2:cdk-12 RNAi	1	0.4399	0.5601	0.09945	3	3	5.633	12
daf-2:cdk-12 RNAi vs. daf-16;daf-2:control RNAi	0.4635	1	-0.5365	0.09945	3	3	5.395	12
daf-2:cdk-12 RNAi vs. daf-16;daf-2:cdk-12 RNAi	0.4635	0.4399	0.02365	0.09945	3	3	0.2378	12
daf-16;daf-2:control RNAi vs. daf-16;daf-2:cdk-12 RNAi	1	0.4399	0.5601	0.09945	3	3	5.633	12

## Sheet: Supplementary FIG 1G 
Supplementary FIG 1G
	% of fertile worms:
		control RNAi			cdk-12 RNAi
	strain	repeat-1	repeat-2	repeat-3	repeat-1	repeat-2	repeat-3
	age-1(-)	100	100	100	2.12766	0	2.38095
	pdk-1(-)	100	100	100	2	3	0
2way ANOVA
Compare each cell mean with the other cell mean in that row
Number of families	1
Number of comparisons per family	2
Alpha	0.05
Sidak's multiple comparisons test	Mean Diff.	95.00% CI of diff.	Significant?	Summary	Adjusted P Value
control RNAi - cdk-12 RNAi
age-1	98.5	96.25 to 100.7	Yes	****	<0.0001
pdk-1	98.33	96.08 to 100.6	Yes	****	<0.0001
Test details	Mean 1	Mean 2	Mean Diff.	SE of diff.	N1	N2	t	DF
control RNAi - cdk-12 RNAi
age-1	100	1.503	98.5	0.8209	3	3	120	8
pdk-1	100	1.667	98.33	0.8209	3	3	119.8	8

## Sheet: FIGURE 2B
FIGURE 2B
		normal				mild				severe
	RNAi	repeat-1	repeat-2	repeat-3	repeat-4	repeat-1	repeat-2	repeat-3	repeat-4	repeat-1	repeat-2	repeat-3	repeat-4
	control	76.0563	70.8333	80.6452	70.9091	23.9437	29.1667	16.129	21.8182	0	0	3.22581	7.27273
	cdk-12	16.2162	6.66667	9.61538	23.913	8.10811	6.66667	11.5385	4.34783	75.6757	86.6667	78.8461	71.7391
	control	86.9565	81.8182	75	60.7143	13.0435	18.1818	22.2222	30.3571	0	0	2.77778	8.92857
	cdk-12	8	3.57143	6.66667	22.449	20	10.7143	16.6667	8.16327	72	85.7143	76.6667	69.3878
	control	75	82.1429	85.1852	61.2903	18.75	17.8571	11.1111	24.1935	6.25	0	3.7037	14.5161
	cdk-12	4.34783	4.34783	10	19.5122	4.34783	4.34783	25	17.0732	91.3043	91.3043	65	63.4146
2way ANOVA
Within each column, compare rows (simple effects within columns)
Number of families	3
Number of comparisons per family	15
Alpha	0.05
Sidak's multiple comparisons test	Mean Diff.	95.00% CI of diff.	Significant?	Summary	Adjusted P Value
normal
WT-control vs. WT-cdk-12	60.51	43.56 to 77.46	Yes	****	<0.0001
WT-control vs. daf-16-control	-1.511	-18.46 to 15.44	No	ns	>0.9999
WT-control vs. daf-16-cdk-12	64.44	47.49 to 81.39	Yes	****	<0.0001
WT-control vs. daf-16;daf-2-control	-1.294	-18.24 to 15.66	No	ns	>0.9999
WT-control vs. daf-16;daf-2-cdk-12	65.06	48.11 to 82.01	Yes	****	<0.0001
WT-cdk-12 vs. daf-16-control	-62.02	-78.97 to -45.07	Yes	****	<0.0001
WT-cdk-12 vs. daf-16-cdk-12	3.931	-13.02 to 20.88	No	ns	>0.9999
WT-cdk-12 vs. daf-16;daf-2-control	-61.8	-78.75 to -44.85	Yes	****	<0.0001
WT-cdk-12 vs. daf-16;daf-2-cdk-12	4.551	-12.40 to 21.50	No	ns	0.9997
daf-16-control vs. daf-16-cdk-12	65.95	49.00 to 82.90	Yes	****	<0.0001
daf-16-control vs. daf-16;daf-2-control	0.2177	-16.73 to 17.17	No	ns	>0.9999
daf-16-control vs. daf-16;daf-2-cdk-12	66.57	49.62 to 83.52	Yes	****	<0.0001
daf-16-cdk-12 vs. daf-16;daf-2-control	-65.73	-82.68 to -48.78	Yes	****	<0.0001
daf-16-cdk-12 vs. daf-16;daf-2-cdk-12	0.6198	-16.33 to 17.57	No	ns	>0.9999
daf-16;daf-2-control vs. daf-16;daf-2-cdk-12	66.35	49.40 to 83.30	Yes	****	<0.0001
mild
WT-control vs. WT-cdk-12	15.1	-1.851 to 32.05	No	ns	0.1211
WT-control vs. daf-16-control	1.813	-15.14 to 18.76	No	ns	>0.9999
WT-control vs. daf-16-cdk-12	8.878	-8.072 to 25.83	No	ns	0.8385
WT-control vs. daf-16;daf-2-control	4.786	-12.16 to 21.74	No	ns	0.9994
WT-control vs. daf-16;daf-2-cdk-12	10.07	-6.878 to 27.02	No	ns	0.6859
WT-cdk-12 vs. daf-16-control	-13.29	-30.24 to 3.665	No	ns	0.2595
WT-cdk-12 vs. daf-16-cdk-12	-6.221	-23.17 to 10.73	No	ns	0.9903
WT-cdk-12 vs. daf-16;daf-2-control	-10.31	-27.26 to 6.638	No	ns	0.6513
WT-cdk-12 vs. daf-16;daf-2-cdk-12	-5.027	-21.98 to 11.92	No	ns	0.999
daf-16-control vs. daf-16-cdk-12	7.065	-9.885 to 24.02	No	ns	0.9693
daf-16-control vs. daf-16;daf-2-control	2.973	-13.98 to 19.92	No	ns	>0.9999
daf-16-control vs. daf-16;daf-2-cdk-12	8.259	-8.692 to 25.21	No	ns	0.8984
daf-16-cdk-12 vs. daf-16;daf-2-control	-4.092	-21.04 to 12.86	No	ns	>0.9999
daf-16-cdk-12 vs. daf-16;daf-2-cdk-12	1.194	-15.76 to 18.14	No	ns	>0.9999
daf-16;daf-2-control vs. daf-16;daf-2-cdk-12	5.286	-11.66 to 22.24	No	ns	0.9982
severe
WT-control vs. WT-cdk-12	-75.61	-92.56 to -58.66	Yes	****	<0.0001
WT-control vs. daf-16-control	-0.302	-17.25 to 16.65	No	ns	>0.9999
WT-control vs. daf-16-cdk-12	-73.32	-90.27 to -56.37	Yes	****	<0.0001
WT-control vs. daf-16;daf-2-control	-3.493	-20.44 to 13.46	No	ns	>0.9999
WT-control vs. daf-16;daf-2-cdk-12	-75.13	-92.08 to -58.18	Yes	****	<0.0001
WT-cdk-12 vs. daf-16-control	75.31	58.35 to 92.26	Yes	****	<0.0001
WT-cdk-12 vs. daf-16-cdk-12	2.29	-14.66 to 19.24	No	ns	>0.9999
WT-cdk-12 vs. daf-16;daf-2-control	72.11	55.16 to 89.06	Yes	****	<0.0001
WT-cdk-12 vs. daf-16;daf-2-cdk-12	0.4761	-16.47 to 17.43	No	ns	>0.9999
daf-16-control vs. daf-16-cdk-12	-73.02	-89.97 to -56.07	Yes	****	<0.0001
daf-16-control vs. daf-16;daf-2-control	-3.191	-20.14 to 13.76	No	ns	>0.9999
daf-16-control vs. daf-16;daf-2-cdk-12	-74.83	-91.78 to -57.88	Yes	****	<0.0001
daf-16-cdk-12 vs. daf-16;daf-2-control	69.82	52.87 to 86.78	Yes	****	<0.0001
daf-16-cdk-12 vs. daf-16;daf-2-cdk-12	-1.814	-18.76 to 15.14	No	ns	>0.9999
daf-16;daf-2-control vs. daf-16;daf-2-cdk-12	-71.64	-88.59 to -54.69	Yes	****	<0.0001
Test details	Mean 1	Mean 2	Mean Diff.	SE of diff.	N1	N2	t	DF
normal
WT-control vs. WT-cdk-12	74.61	14.1	60.51	5.534	4	4	10.93	54
WT-control vs. daf-16-control	74.61	76.12	-1.511	5.534	4	4	0.2731	54
WT-control vs. daf-16-cdk-12	74.61	10.17	64.44	5.534	4	4	11.64	54
WT-control vs. daf-16;daf-2-control	74.61	75.9	-1.294	5.534	4	4	0.2338	54
WT-control vs. daf-16;daf-2-cdk-12	74.61	9.552	65.06	5.534	4	4	11.76	54
WT-cdk-12 vs. daf-16-control	14.1	76.12	-62.02	5.534	4	4	11.21	54
WT-cdk-12 vs. daf-16-cdk-12	14.1	10.17	3.931	5.534	4	4	0.7104	54
WT-cdk-12 vs. daf-16;daf-2-control	14.1	75.9	-61.8	5.534	4	4	11.17	54
WT-cdk-12 vs. daf-16;daf-2-cdk-12	14.1	9.552	4.551	5.534	4	4	0.8224	54
daf-16-control vs. daf-16-cdk-12	76.12	10.17	65.95	5.534	4	4	11.92	54
daf-16-control vs. daf-16;daf-2-control	76.12	75.9	0.2177	5.534	4	4	0.03933	54
daf-16-control vs. daf-16;daf-2-cdk-12	76.12	9.552	66.57	5.534	4	4	12.03	54
daf-16-cdk-12 vs. daf-16;daf-2-control	10.17	75.9	-65.73	5.534	4	4	11.88	54
daf-16-cdk-12 vs. daf-16;daf-2-cdk-12	10.17	9.552	0.6198	5.534	4	4	0.112	54
daf-16;daf-2-control vs. daf-16;daf-2-cdk-12	75.9	9.552	66.35	5.534	4	4	11.99	54
mild
WT-control vs. WT-cdk-12	22.76	7.665	15.1	5.534	4	4	2.728	54
WT-control vs. daf-16-control	22.76	20.95	1.813	5.534	4	4	0.3277	54
WT-control vs. daf-16-cdk-12	22.76	13.89	8.878	5.534	4	4	1.604	54
WT-control vs. daf-16;daf-2-control	22.76	17.98	4.786	5.534	4	4	0.8649	54
WT-control vs. daf-16;daf-2-cdk-12	22.76	12.69	10.07	5.534	4	4	1.82	54
WT-cdk-12 vs. daf-16-control	7.665	20.95	-13.29	5.534	4	4	2.401	54
WT-cdk-12 vs. daf-16-cdk-12	7.665	13.89	-6.221	5.534	4	4	1.124	54
WT-cdk-12 vs. daf-16;daf-2-control	7.665	17.98	-10.31	5.534	4	4	1.864	54
WT-cdk-12 vs. daf-16;daf-2-cdk-12	7.665	12.69	-5.027	5.534	4	4	0.9084	54
daf-16-control vs. daf-16-cdk-12	20.95	13.89	7.065	5.534	4	4	1.277	54
daf-16-control vs. daf-16;daf-2-control	20.95	17.98	2.973	5.534	4	4	0.5373	54
daf-16-control vs. daf-16;daf-2-cdk-12	20.95	12.69	8.259	5.534	4	4	1.492	54
daf-16-cdk-12 vs. daf-16;daf-2-control	13.89	17.98	-4.092	5.534	4	4	0.7394	54
daf-16-cdk-12 vs. daf-16;daf-2-cdk-12	13.89	12.69	1.194	5.534	4	4	0.2157	54
daf-16;daf-2-control vs. daf-16;daf-2-cdk-12	17.98	12.69	5.286	5.534	4	4	0.9552	54
severe
WT-control vs. WT-cdk-12	2.625	78.23	-75.61	5.534	4	4	13.66	54
WT-control vs. daf-16-control	2.625	2.927	-0.302	5.534	4	4	0.05456	54
WT-control vs. daf-16-cdk-12	2.625	75.94	-73.32	5.534	4	4	13.25	54
WT-control vs. daf-16;daf-2-control	2.625	6.117	-3.493	5.534	4	4	0.6312	54
WT-control vs. daf-16;daf-2-cdk-12	2.625	77.76	-75.13	5.534	4	4	13.58	54
WT-cdk-12 vs. daf-16-control	78.23	2.927	75.31	5.534	4	4	13.61	54
WT-cdk-12 vs. daf-16-cdk-12	78.23	75.94	2.29	5.534	4	4	0.4138	54
WT-cdk-12 vs. daf-16;daf-2-control	78.23	6.117	72.11	5.534	4	4	13.03	54
WT-cdk-12 vs. daf-16;daf-2-cdk-12	78.23	77.76	0.4761	5.534	4	4	0.08603	54
daf-16-control vs. daf-16-cdk-12	2.927	75.94	-73.02	5.534	4	4	13.19	54
daf-16-control vs. daf-16;daf-2-control	2.927	6.117	-3.191	5.534	4	4	0.5766	54
daf-16-control vs. daf-16;daf-2-cdk-12	2.927	77.76	-74.83	5.534	4	4	13.52	54
daf-16-cdk-12 vs. daf-16;daf-2-control	75.94	6.117	69.82	5.534	4	4	12.62	54
daf-16-cdk-12 vs. daf-16;daf-2-cdk-12	75.94	77.76	-1.814	5.534	4	4	0.3277	54
daf-16;daf-2-control vs. daf-16;daf-2-cdk-12	6.117	77.76	-71.64	5.534	4	4	12.95	54

## Sheet: FIGURE 2C
FIGURE 2C
		control RNAi				cdk-12 RNAi
	strain	repeat-1	repeat-2	repeat-3	repeat-4	repeat-1	repeat-2	repeat-3	repeat-4
	WT	390.187	278.55	308.25	295	142.075	156	59.79	68.4
	daf-16	329.7	230.514	306.18	301.5	91.03	141.225	88	97.45
	daf-16;daf-2	275.42	218.3	290.3	280.3	89.3	110.74	82.1	79.43
	daf-2	141.97	215	156	225.78	2	0	0	0
2way ANOVA
Compare cell means regardless of rows and columns
Number of families	1
Number of comparisons per family	28
Alpha	0.05
Sidak's multiple comparisons test	Mean Diff.	95.00% CI of diff.	Significant?	Summary	Adjusted P Value
WT:control RNAi vs. WT:cdk-12 RNAi	211.4	122.3 to 300.6	Yes	****	<0.0001
WT:control RNAi vs. daf-16:control RNAi	26.02	-63.14 to 115.2	No	ns	>0.9999
WT:control RNAi vs. daf-16:cdk-12 RNAi	213.6	124.4 to 302.7	Yes	****	<0.0001
WT:control RNAi vs. daf-16;daf-2:control RNAi	51.92	-37.25 to 141.1	No	ns	0.7795
WT:control RNAi vs. daf-16;daf-2:cdk-12 RNAi	227.6	138.4 to 316.8	Yes	****	<0.0001
WT:control RNAi vs. daf-2 :control RNAi	133.3	44.14 to 222.5	Yes	***	0.0006
WT:control RNAi vs. daf-2 :cdk-12 RNAi	317.5	228.3 to 406.7	Yes	****	<0.0001
WT:cdk-12 RNAi vs. daf-16:control RNAi	-185.4	-274.6 to -96.24	Yes	****	<0.0001
WT:cdk-12 RNAi vs. daf-16:cdk-12 RNAi	2.14	-87.03 to 91.31	No	ns	>0.9999
WT:cdk-12 RNAi vs. daf-16;daf-2:control RNAi	-159.5	-248.7 to -70.35	Yes	****	<0.0001
WT:cdk-12 RNAi vs. daf-16;daf-2:cdk-12 RNAi	16.17	-72.99 to 105.3	No	ns	>0.9999
WT:cdk-12 RNAi vs. daf-2 :control RNAi	-78.12	-167.3 to 11.05	No	ns	0.1375
WT:cdk-12 RNAi vs. daf-2 :cdk-12 RNAi	106.1	16.90 to 195.2	Yes	**	0.0096
daf-16:control RNAi vs. daf-16:cdk-12 RNAi	187.5	98.38 to 276.7	Yes	****	<0.0001
daf-16:control RNAi vs. daf-16;daf-2:control RNAi	25.89	-63.27 to 115.1	No	ns	>0.9999
daf-16:control RNAi vs. daf-16;daf-2:cdk-12 RNAi	201.6	112.4 to 290.7	Yes	****	<0.0001
daf-16:control RNAi vs. daf-2 :control RNAi	107.3	18.12 to 196.5	Yes	**	0.0085
daf-16:control RNAi vs. daf-2 :cdk-12 RNAi	291.5	202.3 to 380.6	Yes	****	<0.0001
daf-16:cdk-12 RNAi vs. daf-16;daf-2:control RNAi	-161.7	-250.8 to -72.49	Yes	****	<0.0001
daf-16:cdk-12 RNAi vs. daf-16;daf-2:cdk-12 RNAi	14.03	-75.13 to 103.2	No	ns	>0.9999
daf-16:cdk-12 RNAi vs. daf-2 :control RNAi	-80.26	-169.4 to 8.907	No	ns	0.1138
daf-16:cdk-12 RNAi vs. daf-2 :cdk-12 RNAi	103.9	14.76 to 193.1	Yes	*	0.0119
daf-16;daf-2:control RNAi vs. daf-16;daf-2:cdk-12 RNAi	175.7	86.52 to 264.9	Yes	****	<0.0001
daf-16;daf-2:control RNAi vs. daf-2 :control RNAi	81.39	-7.775 to 170.6	No	ns	0.1028
daf-16;daf-2:control RNAi vs. daf-2 :cdk-12 RNAi	265.6	176.4 to 354.7	Yes	****	<0.0001
daf-16;daf-2:cdk-12 RNAi vs. daf-2 :control RNAi	-94.3	-183.5 to -5.127	Yes	*	0.0306
daf-16;daf-2:cdk-12 RNAi vs. daf-2 :cdk-12 RNAi	89.89	0.7245 to 179.1	Yes	*	0.0467
daf-2 :control RNAi vs. daf-2 :cdk-12 RNAi	184.2	95.02 to 273.4	Yes	****	<0.0001
Test details	Mean 1	Mean 2	Mean Diff.	SE of diff.	N1	N2	t	DF
WT:control RNAi vs. WT:cdk-12 RNAi	318	106.6	211.4	25.46	4	4	8.305	24
WT:control RNAi vs. daf-16:control RNAi	318	292	26.02	25.46	4	4	1.022	24
WT:control RNAi vs. daf-16:cdk-12 RNAi	318	104.4	213.6	25.46	4	4	8.389	24
WT:control RNAi vs. daf-16;daf-2:control RNAi	318	266.1	51.92	25.46	4	4	2.039	24
WT:control RNAi vs. daf-16;daf-2:cdk-12 RNAi	318	90.39	227.6	25.46	4	4	8.941	24
WT:control RNAi vs. daf-2 :control RNAi	318	184.7	133.3	25.46	4	4	5.237	24
WT:control RNAi vs. daf-2 :cdk-12 RNAi	318	0.5	317.5	25.46	4	4	12.47	24
WT:cdk-12 RNAi vs. daf-16:control RNAi	106.6	292	-185.4	25.46	4	4	7.283	24
WT:cdk-12 RNAi vs. daf-16:cdk-12 RNAi	106.6	104.4	2.14	25.46	4	4	0.08406	24
WT:cdk-12 RNAi vs. daf-16;daf-2:control RNAi	106.6	266.1	-159.5	25.46	4	4	6.266	24
WT:cdk-12 RNAi vs. daf-16;daf-2:cdk-12 RNAi	106.6	90.39	16.17	25.46	4	4	0.6353	24
WT:cdk-12 RNAi vs. daf-2 :control RNAi	106.6	184.7	-78.12	25.46	4	4	3.069	24
WT:cdk-12 RNAi vs. daf-2 :cdk-12 RNAi	106.6	0.5	106.1	25.46	4	4	4.166	24
daf-16:control RNAi vs. daf-16:cdk-12 RNAi	292	104.4	187.5	25.46	4	4	7.367	24
daf-16:control RNAi vs. daf-16;daf-2:control RNAi	292	266.1	25.89	25.46	4	4	1.017	24
daf-16:control RNAi vs. daf-16;daf-2:cdk-12 RNAi	292	90.39	201.6	25.46	4	4	7.918	24
daf-16:control RNAi vs. daf-2 :control RNAi	292	184.7	107.3	25.46	4	4	4.214	24
daf-16:control RNAi vs. daf-2 :cdk-12 RNAi	292	0.5	291.5	25.46	4	4	11.45	24
daf-16:cdk-12 RNAi vs. daf-16;daf-2:control RNAi	104.4	266.1	-161.7	25.46	4	4	6.35	24
daf-16:cdk-12 RNAi vs. daf-16;daf-2:cdk-12 RNAi	104.4	90.39	14.03	25.46	4	4	0.5513	24
daf-16:cdk-12 RNAi vs. daf-2 :control RNAi	104.4	184.7	-80.26	25.46	4	4	3.153	24
daf-16:cdk-12 RNAi vs. daf-2 :cdk-12 RNAi	104.4	0.5	103.9	25.46	4	4	4.082	24
daf-16;daf-2:control RNAi vs. daf-16;daf-2:cdk-12 RNAi	266.1	90.39	175.7	25.46	4	4	6.901	24
daf-16;daf-2:control RNAi vs. daf-2 :control RNAi	266.1	184.7	81.39	25.46	4	4	3.197	24
daf-16;daf-2:control RNAi vs. daf-2 :cdk-12 RNAi	266.1	0.5	265.6	25.46	4	4	10.43	24
daf-16;daf-2:cdk-12 RNAi vs. daf-2 :control RNAi	90.39	184.7	-94.3	25.46	4	4	3.704	24
daf-16;daf-2:cdk-12 RNAi vs. daf-2 :cdk-12 RNAi	90.39	0.5	89.89	25.46	4	4	3.531	24
daf-2 :control RNAi vs. daf-2 :cdk-12 RNAi	184.7	0.5	184.2	25.46	4	4	7.235	24

[truncated: 40 more sheets: FIGURE 2D, FIGURE 2E, FIGURE 2F, Supplementary FIG 2C , FIGURE 3A, FIGURE 3B, FIGURE 3C, FIGURE 3E, FIGURE 3F, FIGURE 3G, FIGURE 3H, FIGURE 3I, FIGURE 3J, FIGURE 3K, Supplementary FIG 3A, Supplementary FIG 3B, Supplementary FIG 3C, Supplementary FIG 3E, Supplementary FIG 3F, Supplementary FIG 3G …]
